# Supplementary material for: Peripheral T cell profiling reveals downregulated exhaustion marker and increased diversity in lymphedema post-lymphatic venous anastomosis
Source: PubMed Central journal article supplement (PMC10212982; doi:10.1016/j.isci.2023.106822), 2023-05-06
Supplement: mmc1.pdf [file mmc1.pdf]

**Supplemental information**

**Peripheral T cell profiling reveals downregulated  
exhaustion marker and increased diversity  
in lymphedema post-lymphatic venous anastomosis**

**Hirofumi Imai, Takakazu Kawase, Shuhei Yoshida, Toshiro Mese, Solji Roh, Asuka Fujita, Toshio Uchiki, Ayano Sasaki, Shogo Nagamatsu, Atsushi Takazawa, Tatsuo Ichinohe, and Isao Koshima**

## Supplemental information

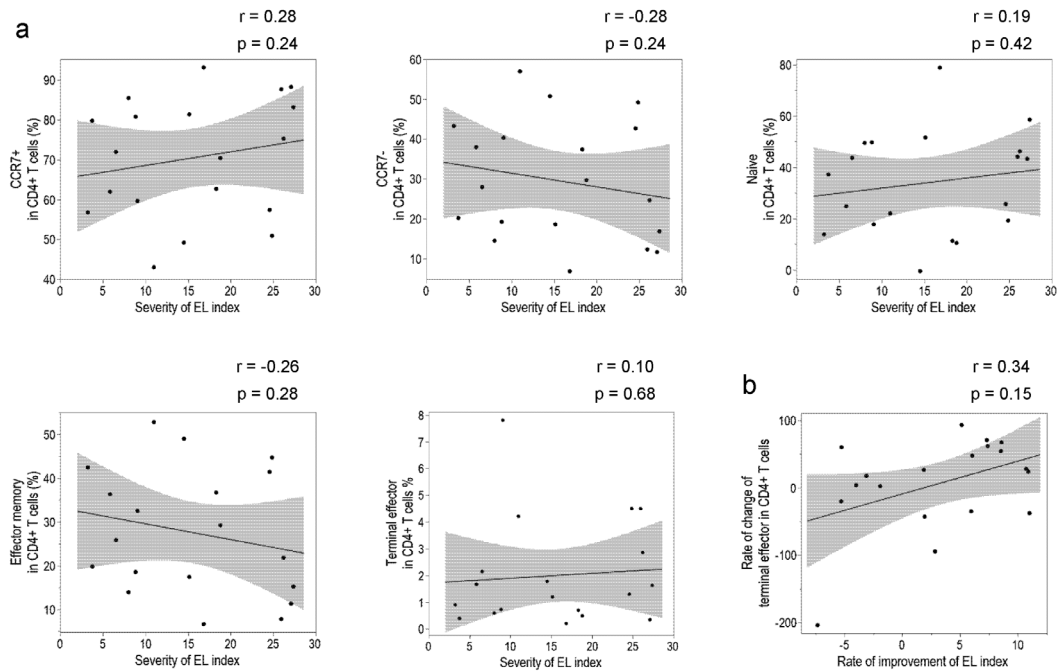

Figure S1. Correlation between Naïve memory phenotype in CD4<sup>+</sup> T cells and clinical features; Related to Figure 5. **(a)** Correlation between Naïve memory phenotype in CD4<sup>+</sup> T cells and severity of extremity lymphedema (EL) index. **(b)** Correlation between rate of change of terminal effector (TE) and rate of improvement of EL index.

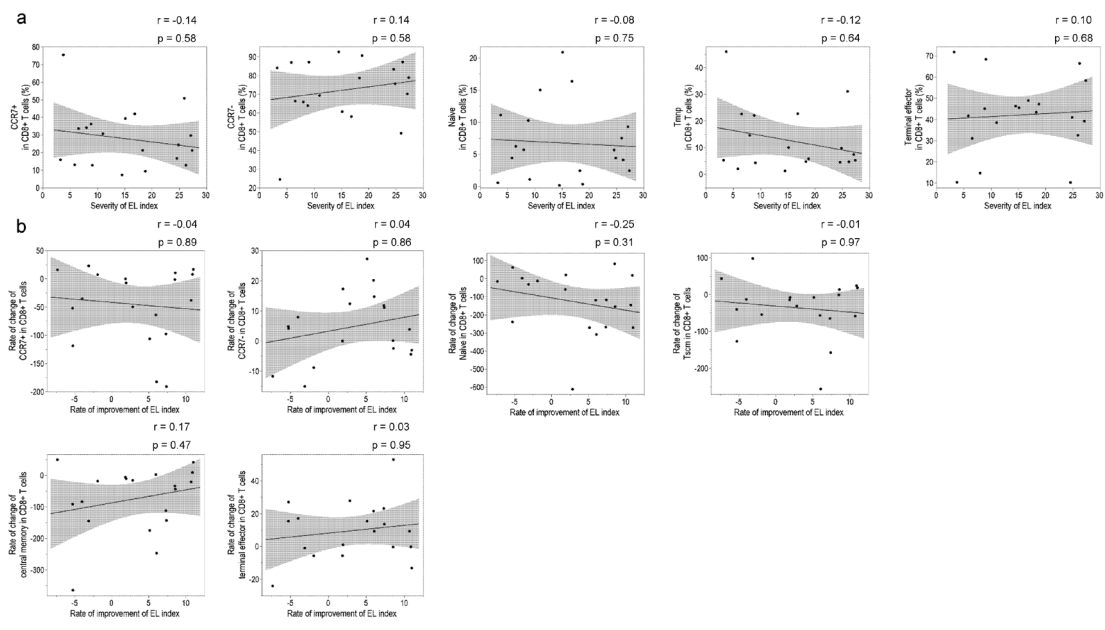

Figure S2. Correlation between naïve memory phenotype in CD8<sup>+</sup> T cells and clinical features; Related to Figure 6. **(a)** Correlation between naïve memory phenotype in CD8<sup>+</sup> T cells and severity of extremity lymphedema (EL) index. **(b)** Correlation between rate of change of Naïve memory phenotype and rate of improvement of EL index.

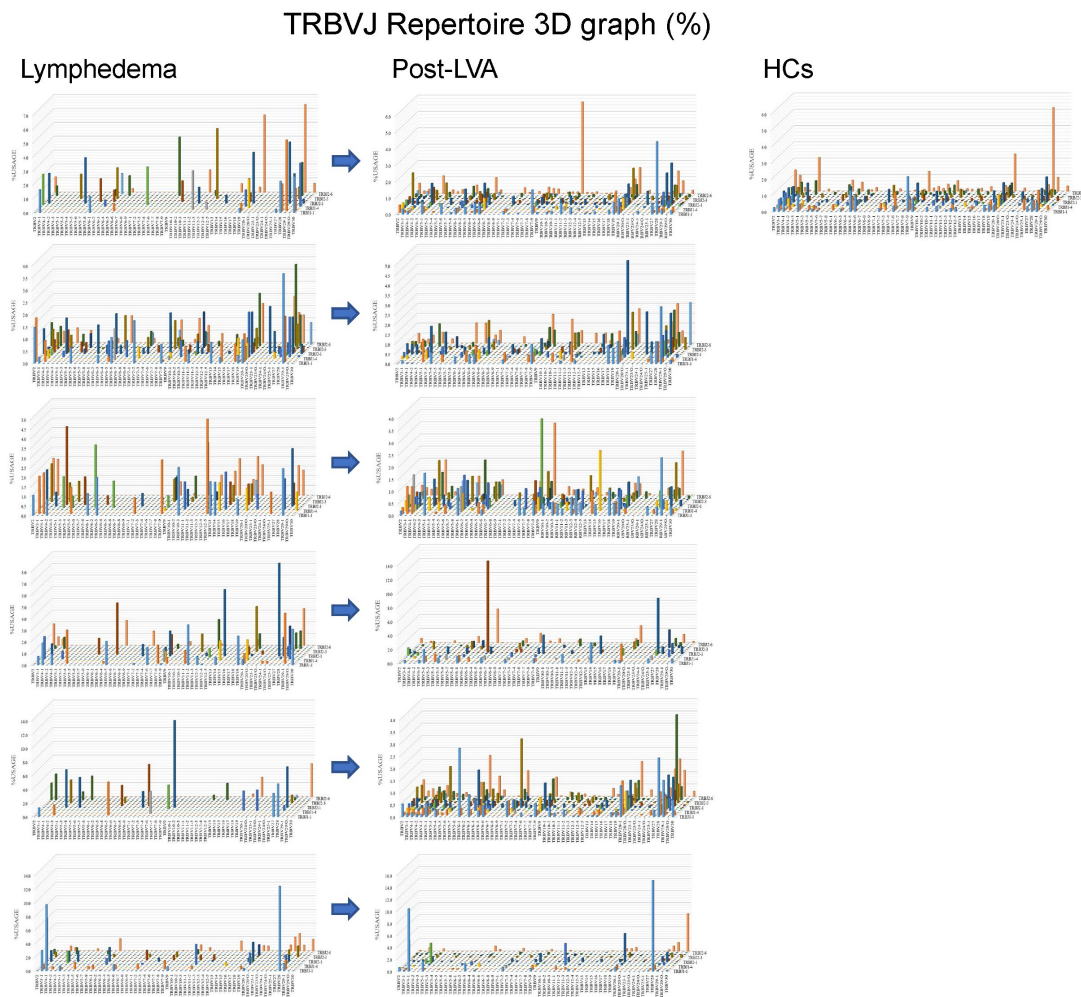

Figure S3. Variety of TRBV and J combination in lymphedema, post-lymphatic venous anastomosis (LVA), and healthy control (HC) samples; Related to Figure 9.

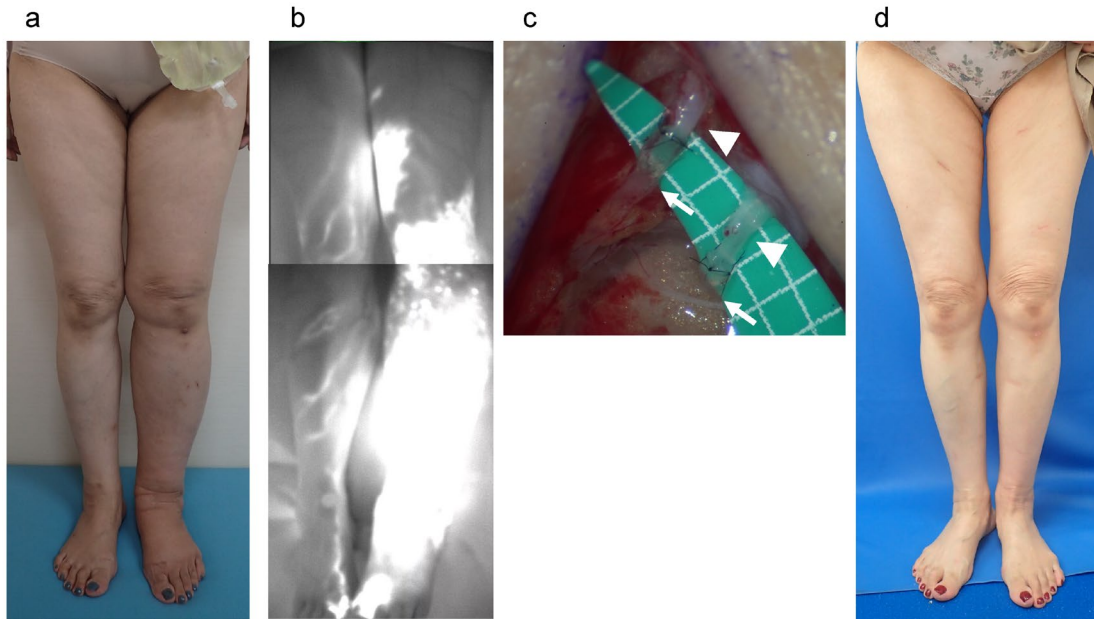

Figure S4. Edematous condition of patients with left lower limb lymphedema; Related to Figure 1. **(a)**. Compared with those on the right side, the circumferences are higher on the left side. **(b)**. The indocyanine green lymphology shows marked dermal backflow on the left side, while a linear pattern can be noted on the right side. **(c)** Lymphatic venous anastomosis (LVA) was performed for the patient. Arrow indicates the lymphatic channel, and the arrowhead indicates the vein. The scale of the background sheet is 1 mm. **(d)** The circumference in the left lower extremity was decreased at 1-year post-LVA.



Table S1. Clinical characteristics of patients; Related to Figure 1.

| Demographic                                | Lymphedema<br>(n = 21) | Healthy controls<br>(n = 20) | p Value |
|--------------------------------------------|------------------------|------------------------------|---------|
| Sex, n (%)                                 |                        |                              |         |
| Male                                       | 0 (0)                  | 0 (0)                        | 1.0     |
| Female                                     | 21 (100)               | 20 (100)                     |         |
| Age, y, median (IQR)                       | 54 (45–59.8)           | 51 (44.5–63)                 | 0.55    |
| BMI, kg/m <sup>2</sup> , median (IQR)      | 20.7 (19.2–25.1)       | N/A                          | N/A     |
| Upper or lower extremity lymphedema, n (%) |                        | N/A                          | N/A     |
| Upper extremity lymphedema                 | 4 (19.0)               |                              |         |
| Lower extremity lymphedema                 | 17 (81.0)              |                              |         |
| Etiology, n (%)                            |                        | None                         | None    |
| Uterine cancer                             | 14 (66.7)              |                              |         |
| Ovarian cancer                             | 2 (9.5)                |                              |         |
| Bladder cancer                             | 1 (4.8)                |                              |         |
| Breast cancer                              | 4 (19.0)               |                              |         |
| Duration of edema, y, median (IQR)         | 2.7 (0.5–7.5)          | None                         | None    |
| Chemotherapy, yes, n (%)                   | 16 (76.2)              | None                         | None    |
| Radiotherapy, yes, n (%)                   | 7 (33.3)               | None                         | None    |
| Cellulitis episode, yes, n (%)             | 7 (33.3)               | None                         | None    |
| ISL stage, n (%)                           |                        | N/A                          | N/A     |
| Stage 1                                    | 0 (0)                  |                              |         |
| Stage 2a                                   | 5 (23.8)               |                              |         |
| Stage 2b                                   | 13 (61.9)              |                              |         |
| Stage 3                                    | 3 (14.3)               |                              |         |
| Dermal backflow stage, n (%)               |                        | N/A                          | N/A     |
| Stage I                                    | 0                      |                              |         |
| Stage II                                   | 4 (19.0)               |                              |         |
| Stage III                                  | 7 (33.3)               |                              |         |
| Stage IV                                   | 4 (19.0)               |                              |         |
| Stage V                                    | 4 (19.0)               |                              |         |

BMI: Body mass index. IQR: Interquartile range. ISL: International Society of Lymphology

Table S2. Comparison of extremity lymphedema index and leukocyte characteristics between lymphedema, post-lymphatic venous anastomosis (LVA), and healthy controls (HCs); Related to Figure 1.

| Demographic, median (IQR)                | Lymphedema<br>(n = 21) | Post-LVA<br>(n = 21)    | HCs<br>(n = 20)     | p-value                    |                       |                     |
|------------------------------------------|------------------------|-------------------------|---------------------|----------------------------|-----------------------|---------------------|
|                                          |                        |                         |                     | Lymphedema vs.<br>Post-LVA | HCs vs.<br>Lymphedema | Post-LVA vs.<br>HCs |
| UEL index                                | 126.7<br>(106.0–159.8) | 125.4<br>(108.9–143.2)  | N/A                 | 0.25                       | N/A                   | N/A                 |
| LEL index                                | 265.5<br>(245.2–307.7) | 251.7<br>(241.9–263.5)  | N/A                 | 0.01                       | N/A                   | N/A                 |
| Severity of EL index                     | 16.8 (8.4–25.4)        | 12.3 (4.1–18.1)         | N/A                 | < 0.01                     | N/A                   | N/A                 |
| Leukocyte count, n/ $\mu$ l              | 5300<br>(4535–6045)    | 4515<br>(3705–5298)     | 5110<br>(3885–5920) | 0.27                       | 0.48                  | 0.57                |
| Lymphocyte count, n/ $\mu$ l             | 1790<br>(1132–2010)    | 1410<br>(1184.5 – 1939) | 1810<br>(1551–2229) | 0.50                       | 0.44                  | 0.14                |
| CD4/8 ration in CD3 <sup>+</sup> T cells | 1.5 (0.9–2.5)          | 1.5 (0.9–2.0)           | 1.8 (1.4–2.5)       | 0.07                       | 0.21                  | 0.08                |

IQR: Interquartile range. UEL: Upper extremity lymphedema index. LEL: Lower extremity lymphedema index



Table S3. Comparison of PD-1, Tim-3, Lag-3, and PD-1<sup>+</sup>Tim3<sup>+</sup> expression (%) on CD4<sup>+</sup> and CD8<sup>+</sup> T cells between lymphedema, post-lymphatic venous anastomosis (LVA), and healthy controls (HCs); Related to Figures 2 and 3.

| Demographic %, median (IQR)                                                     | Lymphedema<br>(n = 21) | Post-LVA<br>(n = 21) | HCs<br>(n = 20)  | p-value                    |                       |                     |
|---------------------------------------------------------------------------------|------------------------|----------------------|------------------|----------------------------|-----------------------|---------------------|
|                                                                                 |                        |                      |                  | Lymphedema vs.<br>Post-LVA | HCs vs.<br>Lymphedema | Post-LVA vs.<br>HCs |
| PD-1 <sup>+</sup> in CD3 <sup>+</sup> 4 <sup>+</sup> T cells                    | 30.7 (19.8–39.1)       | 27.1 (17.6–35.4)     | 19.9 (13.9–24.7) | 0.03                       | < 0.01                | 0.02                |
| Tim-3 <sup>+</sup> in CD3 <sup>+</sup> 4 <sup>+</sup> T cells                   | 1.4 (0.9–3.0)          | 1.0 (0.7–1.4)        | 1.3 (0.6–1.5)    | < 0.01                     | 0.29                  | 0.51                |
| Lag-3 <sup>+</sup> in CD3 <sup>+</sup> 4 <sup>+</sup> T cells                   | 0.6 (0.4–0.8)          | 0.4 (0.3–0.7)        | 0.4 (0.3–0.6)    | 0.06                       | 0.01                  | 0.40                |
| PD-1 <sup>+</sup> Tim-3 <sup>+</sup> in CD3 <sup>+</sup> 4 <sup>+</sup> T cells | 0.7 (0.4–1.1)          | 0.3 (0.2–0.6)        | 0.3 (0.2–0.6)    | < 0.01                     | 0.04                  | 0.69                |
| PD-1 <sup>+</sup> in CD3 <sup>+</sup> 8 <sup>+</sup> T cells                    | 17.1 (11.7–25)         | 15.9 (10.2–19.4)     | 17.5 (9.4–20.6)  | 0.01                       | 0.26                  | 0.66                |
| Tim-3 <sup>+</sup> in CD3 <sup>+</sup> 8 <sup>+</sup> T cells                   | 3.5 (1.8–6.5)          | 2.2 (1.3–4.0)        | 3.4 (2.5–4.2)    | 0.01                       | 0.57                  | 0.09                |
| Lag-3 <sup>+</sup> in CD3 <sup>+</sup> 8 <sup>+</sup> T cells                   | 1.2 (0.7–1.7)          | 0.7 (0.5–1.6)        | 0.8 (0.5–1.3)    | 0.15                       | 0.09                  | 0.75                |
| PD-1 <sup>+</sup> Tim-3 <sup>+</sup> in CD3 <sup>+</sup> 8 <sup>+</sup> T cells | 0.6 (0.3–1.0)          | 0.2 (0.1–0.5)        | 0.3 (0.2–0.7)    | 0.01                       | 0.08                  | 0.56                |

IQR: Interquartile range

Table S4. Comparison of percentage of Treg subsets among CD3<sup>+</sup>CD4<sup>+</sup> T cells (%)

between lymphedema, post-lymphatic venous anastomosis (LVA), and healthy controls

(HCs); Related to Figure 4.

| Demographic %, median (IQR)                         | Lymphedema<br>(n = 21) | Post-LVA<br>(n = 21) | HCs<br>(n = 20) | p-value                    |                       |                     |
|-----------------------------------------------------|------------------------|----------------------|-----------------|----------------------------|-----------------------|---------------------|
|                                                     |                        |                      |                 | Lymphedema vs.<br>Post-LVA | HCs vs.<br>Lymphedema | Post-LVA vs.<br>HCs |
| Treg in CD3 <sup>+</sup> 4 <sup>+</sup> T cells     | 5.3 (3.0–7.4)          | 5.1 (2.9–6.1)        | 2.5 (1.4–4.6)   | 0.17                       | <0.01                 | 0.03                |
| Treg I in CD3 <sup>+</sup> 4 <sup>+</sup> T cells   | 0.6 (0.4–0.9)          | 0.5 (0.3–0.7)        | 0.4 (0.3–1.1)   | 0.09                       | 0.26                  | 0.67                |
| Treg II in CD3 <sup>+</sup> 4 <sup>+</sup> T cells  | 1.1 (0.8–2.1)          | 1.4 (0.9–2.6)        | 0.5 (0.3–0.9)   | 0.25                       | < 0.001               | < 0.0001            |
| Treg III in CD3 <sup>+</sup> 4 <sup>+</sup> T cells | 2.8 (1.8–4.5)          | 2.5 (1.7–3.3)        | 1.6 (0.9–3.0)   | 0.06                       | 0.02                  | 0.14                |

IQR: Interquartile range

Table S5. Comparison of naïve and memory phenotype frequencies in CD4<sup>+</sup> and CD8<sup>+</sup> T cells between lymphedema, post-lymphatic venous anastomosis (LVA), and healthy controls (HCs); Related to Figures 5, 6.

| Demographic %, median (IQR)                   | Lymphedema<br>(n = 21) | Post-LVA<br>(n = 21) | HCs<br>(n = 20)  | p-value                    |                       |                     |
|-----------------------------------------------|------------------------|----------------------|------------------|----------------------------|-----------------------|---------------------|
|                                               |                        |                      |                  | Lymphedema vs.<br>Post-LVA | HCs vs.<br>Lymphedema | Post-LVA vs.<br>HCs |
| CCR7 <sup>+</sup> in CD4 <sup>+</sup> T cells | 72.0 (57.4–83.2)       | 74.1 (57.8–79.5)     | 83.6 (76.5–87.2) | 0.31                       | 0.02                  | < 0.01              |
| CCR7 <sup>-</sup> in CD4 <sup>+</sup> T cells | 28.0 (16.8–42.7)       | 26 (20.1–42.2)       | 16.4 (12.9–23.5) | 0.32                       | 0.02                  | < 0.01              |
| Naive in CD4 <sup>+</sup> T cells             | 37.2 (17.8–49.5)       | 35.1 (17.6–40.0)     | 51.1 (39.6–57.0) | 0.05                       | 0.01                  | < 0.01              |
| Tscm in CD4 <sup>+</sup> T cells              | 3.1 (2.1–4.8)          | 4.2 (2.7–5.4)        | 2.8 (2.1–3.9)    | 0.06                       | 0.51                  | 0.03                |
| Tmnp in CD4 <sup>+</sup> T cells              | 3.4 (1.5–6.2)          | 8.1 (2.7–13.6)       | 3.1 (1.5–9.1)    | 0.12                       | 0.78                  | 0.17                |
| Central memory in CD4 <sup>+</sup> T cells    | 27.8 (20.0–32.0)       | 29.3 (22.1–31.8)     | 24.8 (18.2–29.1) | 0.25                       | 0.31                  | 0.19                |
| Effector memory in CD4 <sup>+</sup> T cells   | 25.8 (15.2–41.4)       | 24.9 (18.5–38.2)     | 16.0 (12.2–21.8) | 0.46                       | 0.02                  | < 0.01              |
| Terminal effector in CD4 <sup>+</sup> T cells | 1.3 (0.6–2.9)          | 2.4 (0.9–4.5)        | 0.7 (0.4–1.3)    | 0.02                       | 0.17                  | 0.01                |
| CCR7 <sup>+</sup> in CD8 <sup>+</sup> T cells | 24.3 (13.1–36.1)       | 18.6 (9.2–36.5)      | 41.5 (35.9–54.6) | 0.02                       | < 0.001               | < 0.001             |
| CCR7 <sup>-</sup> in CD8 <sup>+</sup> T cells | 75.7 (63.9–87)         | 81.4 (63.6–90.8)     | 58.6 (45.4–64.2) | 0.02                       | < 0.001               | < 0.001             |
| Naive in CD8 <sup>+</sup> T cells             | 5.7 (2.4–10.3)         | 2.2 (0.7–7.6)        | 10.8 (6.5–23.1)  | < 0.01                     | < 0.01                | < 0.001             |
| Tscm in CD8 <sup>+</sup> T cells              | 3.4 (2.1–5.5)          | 3.0 (2.2–3.4)        | 3.5 (2.0–4.6)    | 0.04                       | 1.0                   | 0.16                |
| Tmnp in CD8 <sup>+</sup> T cells              | 6.6 (4.7–22.2)         | 7.9 (3.3–23.0)       | 22.3 (11.5–29.3) | 0.42                       | < 0.01                | 0.01                |
| Central memory in CD8 <sup>+</sup> T cells    | 3.6 (2.4–6.3)          | 2.6 (1.8–3.6)        | 4.1 (3.0–5.2)    | < 0.01                     | 0.61                  | 0.01                |
| Effector memory in CD8 <sup>+</sup> T cells   | 30.9 (16.7–43.5)       | 26.1 (19.2–33.3)     | 31.2 (19.4–35.6) | 0.22                       | 0.95                  | 0.82                |
| Terminal effector in CD8 <sup>+</sup> T cells | 43.4 (32.5–48.9)       | 49.3 (30.9–58.6)     | 23.5 (17.3–34.1) | 0.02                       | < 0.01                | < 0.01              |

IQR: Interquartile range

Tscm: stem cell-like memory T cell

Tmnp: memory T cells with naïve phenotype

Table S6. Comparison of cytokine production in CD4<sup>+</sup> and CD8<sup>+</sup> T cells between

lymphedema, post-lymphatic venous anastomosis (LVA), and healthy controls (HCs);

Related to Figures 7 and 8.

| Demographic %, median (IQR)                                                | Lymphedema<br>(n = 10) | Post-LVA<br>(n = 10) | HCs<br>(n = 10)  | p-value                    |                       |                     |
|----------------------------------------------------------------------------|------------------------|----------------------|------------------|----------------------------|-----------------------|---------------------|
|                                                                            |                        |                      |                  | Lymphedema vs.<br>Post-LVA | HCs vs.<br>Lymphedema | Post-LVA vs.<br>HCs |
| IFN- $\gamma$ in CD3 <sup>+</sup> 4 <sup>+</sup> T cells                   | 10.8 (7.1–20.3)        | 9.7 (6.1–20.1)       | 6.9 (4.6–9.7)    | 0.18                       | 0.03                  | 0.28                |
| IFN- $\gamma$ in CD3 <sup>+</sup> 4 <sup>+</sup> PD-1 <sup>+</sup> T cells | 30.1 (19.7–40.9)       | 24.7 (19.0–26.1)     | 20.6 (16.0–25.1) | 0.04                       | 0.03                  | 0.44                |
| IFN- $\gamma$ in CD3 <sup>+</sup> 4 <sup>+</sup> PD-1 <sup>-</sup> T cells | 5.8 (3.6–11.1)         | 5.9 (2.8–12.5)       | 3.7 (3.0–5.0)    | 0.29                       | 0.05                  | 0.38                |
| IL-4 in CD3 <sup>+</sup> 4 <sup>+</sup> T cells                            | 2.1 (1.5–5.8)          | 2.3 (2.2–3.8)        | 1.9 (1.2–2.3)    | 0.47                       | 0.28                  | 0.12                |
| IL-4 in CD3 <sup>+</sup> 4 <sup>+</sup> PD-1 <sup>+</sup> T cells          | 4.9 (4.3–11.1)         | 4.5 (3.0–5.5)        | 4.5 (3.5–5.5)    | 0.34                       | 0.25                  | 0.92                |
| IL-4 in CD3 <sup>+</sup> 4 <sup>+</sup> PD-1 <sup>-</sup> T cells          | 1.4 (0.8–3.9)          | 1.8 (1.3–2.9)        | 1.1 (0.8–1.5)    | 0.29                       | 0.37                  | 0.10                |
| IL-17A in CD3 <sup>+</sup> 4 <sup>+</sup> T cells                          | 2.7 (1.8–3.3)          | 1.6 (0.9–2.3)        | 1.7 (1.5–2.2)    | 0.01                       | 0.06                  | 0.60                |
| IL-17A in CD3 <sup>+</sup> 4 <sup>+</sup> PD-1 <sup>+</sup> T cells        | 5.5 (3.6–6.3)          | 4.0 (2.7–4.5)        | 6.2 (4.9–6.8)    | 0.04                       | 0.29                  | < 0.01              |
| IL-17A in CD3 <sup>+</sup> 4 <sup>+</sup> PD-1 <sup>-</sup> T cells        | 1.3 (0.8–2.5)          | 0.8 (0.4–1.6)        | 0.7 (0.5–1.1)    | 0.01                       | 0.10                  | 0.79                |
| IFN- $\gamma$ in CD3 <sup>+</sup> 8 <sup>+</sup> T cells                   | 47.1 (38.1–56.6)       | 41.2 (40.3–49.8)     | 31.3 (19.5–44.8) | 0.23                       | 0.02                  | 0.05                |
| IFN- $\gamma$ in CD3 <sup>+</sup> 8 <sup>+</sup> PD-1 <sup>+</sup> T cells | 66.2 (59.5–70.5)       | 52.6 (43.0–61.1)     | 64.6 (42.5–75.3) | 0.07                       | 0.76                  | 0.32                |
| IFN- $\gamma$ in CD3 <sup>+</sup> 8 <sup>+</sup> PD-1 <sup>-</sup> T cells | 45.9 (34.5–54.8)       | 41.0 (39.0–47.9)     | 27.6 (17.4–40.3) | 0.27                       | 0.01                  | 0.02                |
| IL-4 in CD3 <sup>+</sup> 8 <sup>+</sup> T cells                            | 1.8 (0.8–2.6)          | 1.6 (0.5–2.4)        | 1.0 (0.8–1.4)    | 0.34                       | 0.16                  | 0.38                |
| IL-4 in CD3 <sup>+</sup> 8 <sup>+</sup> PD-1 <sup>+</sup> T cells          | 2.3 (0.9–2.7)          | 2.0 (1.3–2.2)        | 2.1 (1.2–2.7)    | 0.34                       | 0.87                  | 0.44                |
| IL-4 in CD3 <sup>+</sup> 8 <sup>+</sup> PD-1 <sup>-</sup> T cells          | 1.7 (0.7–2.6)          | 1.5 (0.5–2.4)        | 1.0 (0.7–1.2)    | 0.40                       | 0.20                  | 0.24                |
| IL-17A in CD3 <sup>+</sup> 8 <sup>+</sup> T cells                          | 0.5 (0.2–0.6)          | 0.2 (0.1–0.4)        | 0.2 (0.1–0.5)    | 0.16                       | 0.33                  | 0.66                |
| IL-17A in CD3 <sup>+</sup> 8 <sup>+</sup> PD-1 <sup>+</sup> T cells        | 0.7 (0.5–1.2)          | 0.4 (0.2–0.8)        | 0.7 (0.3–0.9)    | 0.10                       | 0.50                  | 0.37                |
| IL-17A in CD3 <sup>+</sup> 8 <sup>+</sup> PD-1 <sup>-</sup> T cells        | 0.4 (0.1–0.6)          | 0.1 (0.1–0.4)        | 0.2 (0.1–0.4)    | 0.16                       | 0.29                  | 0.79                |

IQR: Interquartile range

Table S7. Comparison of diversity index of T cell receptor between lymphedema, post-lymphatic venous anastomosis (LVA), and healthy controls (HCs); Related to Figure 9.

| Demographic, median (IQR) | Lymphedema (n = 6)        | Post-LVA (n = 6)          | HCs (n = 5)               | P value                 |                    |                  |
|---------------------------|---------------------------|---------------------------|---------------------------|-------------------------|--------------------|------------------|
|                           |                           |                           |                           | Lymphedema vs. Post-LVA | HCs vs. Lymphedema | Post-LVA vs. HCs |
| Total read, n             | 223228<br>(156631–333851) | 235896<br>(154459–379691) | 336850<br>(249651–431229) | 0.22                    | 0.12               | 0.24             |
| Functional read, n        | 122939<br>(75361–184743)  | 135626<br>(75706–193075)  | 185662<br>(134533–226968) | 0.28                    | 0.17               | 0.32             |
| In flame read, n          | 118995<br>(70013–181235)  | 130535<br>(72726–188194)  | 175301<br>(127220–214288) | 0.16                    | 0.24               | 0.41             |
| Unique read, n            | 6596<br>(5515–9933)       | 8532<br>(7497–10447)      | 11358<br>(10681–20184)    | 0.28                    | 0.03               | 0.04             |
| Shannon Weaver index      | 4.7 (4.3–5.4)             | 6.1 (5.4–6.9)             | 6.1 (5.8–6.6)             | 0.02                    | 0.01               | 0.86             |
| Inverse Simpson's index   | 44.1 (30.6–95.1)          | 200.5 (47.2–287)          | 151.0 (132.0–299.5)       | 0.02                    | 0.03               | 1.00             |
| Pielou's evenness         | 0.56 (0.50–0.61)          | 0.67 (0.60–0.75)          | 0.67 (0.63–0.69)          | 0.02                    | < 0.01             | 1.00             |
| Diversity Evenness 50     | 0.4 (0.2–0.6)             | 1.2 (0.4–2.7)             | 1.1 (0.7–1.2)             | 0.03                    | 0.01               | 0.72             |

IQR: Interquartile range

Table S8. Top 50 increased TCR  $\beta$  clones in post-lymphatic venous anastomosis compared with that in lymphedema; Related to Figure 10.

| TRBV | TRBJ | CDR3              | Amount reads of change |
|------|------|-------------------|------------------------|
| 9    | 2-1  | CASSVGQFNEQFF     | 14897                  |
| 7-3  | 2-2  | CASIREYTGELFF     | 7204                   |
| 28   | 2-1  | CASSIQGNEQFF      | 7012                   |
| 5-1  | 2-1  | CASSLEPGGPQFF     | 6254                   |
| 6-5  | 1-2  | CASNYKGGNYGYTF    | 5768                   |
| 30   | 2-7  | CAWSVTDNEQYF      | 5723                   |
| 12-4 | 2-3  | CASSLGWADTQYF     | 5342                   |
| 5-5  | 2-1  | CASSPGDSHNEQFF    | 5182                   |
| 30   | 1-1  | CAWFADGQNTAEFF    | 5157                   |
| 20-1 | 2-7  | CSAREEVGGDEQYF    | 4957                   |
| 5-4  | 1-2  | CASSEWDSGSIYGYTF  | 4891                   |
| 20-1 | 2-3  | CSALRGSSGGRDTQYF  | 4748                   |
| 28   | 1-1  | CASSSLVGFMNTEAFF  | 4660                   |
| 14   | 2-1  | CASSPDRARQFF      | 4623                   |
| 7-9  | 2-5  | CASSLQGETQYF      | 4453                   |
| 3-1  | 2-5  | CASSRRLATQETQYF   | 4365                   |
| 7-9  | 1-6  | CASNGGSHSPLHF     | 4129                   |
| 5-6  | 2-5  | CASSAVTTQETQYF    | 4059                   |
| 27   | 1-1  | CASRRTGEPNTEAFF   | 4013                   |
| 5-1  | 2-3  | CASSFQGLSTDTQYF   | 3954                   |
| 7-6  | 1-3  | CASSLGTANSNGNTIYF | 3918                   |
| 29-1 | 2-7  | CSAIASGSWEQYF     | 3885                   |
| 29-1 | 1-1  | CSVVTGSTEAFF      | 3661                   |
| 23-1 | 1-5  | CATGGSQGNQPQHF    | 3589                   |
| 6-6  | 2-2  | CASTQTATGELFF     | 3575                   |
| 11-2 | 1-1  | CASSLDRGKNTEAFF   | 3508                   |
| 12-4 | 2-5  | CASSLQARREETQYF   | 3448                   |
| 12-5 | 1-2  | CASGHGPGTGYYGYTF  | 3432                   |
| 6-5  | 1-1  | CASSYSIPGAGTEAFF  | 3399                   |
| 19   | 1-5  | CASSMTAVGGNQPQHF  | 3335                   |
| 20-1 | 2-7  | CSAFGGGLRSYEQYF   | 3296                   |

|      |     |                  |      |
|------|-----|------------------|------|
| 20-1 | 2-1 | CSAGSLSYNEQFF    | 3163 |
| 4-1  | 1-1 | CASSYDRLLDTEAFF  | 3147 |
| 2    | 2-7 | CASRGTVYEQYF     | 3111 |
| 29-1 | 2-7 | CSVAVHTTYEQYF    | 3084 |
| 5-6  | 2-1 | CASSPPGGGPHEQFF  | 3065 |
| 20-1 | 1-4 | CSARASGGPNEKLFF  | 3004 |
| 2    | 2-5 | CASSEERETQYF     | 2968 |
| 7-3  | 1-6 | CASSLNAGANSPLHF  | 2935 |
| 11-2 | 1-3 | CASSQGSMTGFTIYF  | 2916 |
| 14   | 1-4 | CASSQRGTGINEKLFF | 2874 |
| 7-9  | 2-2 | CASAPGTLTGELFF   | 2859 |
| 7-2  | 2-1 | CASSLYGGGGRNEQFF | 2814 |
| 13   | 2-5 | CASSPWTSQVQETQYF | 2800 |
| 30   | 1-1 | CAWVPGPSSTEAFF   | 2767 |
| 7-8  | 1-2 | CASSRTGIYYGYTF   | 2713 |
| 7-2  | 1-1 | CASSLRTGEAFF     | 2711 |
| 2    | 1-1 | CASTSWTTGDAFF    | 2669 |
| 29-1 | 1-1 | CSSRWGAEAFF      | 2615 |
| 29-1 | 1-2 | CSVEAMDRGRNYGYTF | 2613 |

Table S9. Top 50 reduced TCR  $\beta$  clones in post-lymphatic venous anastomosis compared with that in lymphedema; Related to Figure 10.

| TRBV | TRBJ | CDR3                 | Amount reads of change |
|------|------|----------------------|------------------------|
| 6-5  | 2-2  | CASSYSGNTGELFF       | 17473                  |
| 11-2 | 2-7  | CASSLTDQGYEQYF       | 6265                   |
| 6-5  | 2-7  | CASSSDGFYEQYF        | 5097                   |
| 28   | 1-1  | CASMDRGNTEAFF        | 4438                   |
| 14   | 1-1  | CASSQDRIEAFF         | 4289                   |
| 7-9  | 1-6  | CASSSHESGGVSSPLHF    | 3324                   |
| 28   | 1-1  | CASSPPDRGAFF         | 3178                   |
| 20-1 | 2-1  | CSARDPPPSGRGNEQFF    | 2973                   |
| 30   | 2-7  | CAWSPLGLADLRDNEQYF   | 2601                   |
| 7-6  | 2-7  | CASSPGYEQYF          | 2545                   |
| 5-1  | 1-1  | CASSLAQGGKHTTEAFF    | 2458                   |
| 11-2 | 1-1  | CASSSDSKLNTEAFF      | 2385                   |
| 7-9  | 2-1  | CASSLIGVSSYNEQFF     | 2327                   |
| 20-1 | 1-2  | CSARGASRAYGYTF       | 2171                   |
| 5-4  | 1-2  | CASSRKLTYTF          | 2095                   |
| 2    | 1-6  | CASRTGQSYNSPLHF      | 2063                   |
| 6-1  | 2-3  | CASSVDHFTDTQYF       | 2043                   |
| 30   | 2-6  | CAGQGVLGANVLTF       | 2039                   |
| 4-3  | 2-3  | CASSQDLGGRSTDTQYF    | 2012                   |
| 19   | 1-6  | CASSQDRNSPLHF        | 1961                   |
| 29-1 | 1-5  | CSVAGVNQPQHF         | 1904                   |
| 6-3  | 2-4  | CASSYSSSGGTSVAKNIQYF | 1851                   |
| 6-1  | 1-1  | CASSEKENTTEAFF       | 1828                   |
| 29-1 | 1-1  | CSVGTGNTEAFF         | 1827                   |
| 5-5  | 2-1  | CASSLGWSSGRVSYNEQFF  | 1810                   |
| 6-6  | 2-1  | CASRNNGPNNEQFF       | 1795                   |
| 20-1 | 1-2  | CSARGDVTDSGDLFNQYTF  | 1782                   |
| 6-1  | 1-1  | CASSVVGLNTEAFF       | 1730                   |
| 6-1  | 1-2  | CASSDGRELLKLYGYTF    | 1688                   |
| 6-1  | 2-4  | CASSVRQEAGKNIQYF     | 1619                   |
| 29-1 | 2-7  | CSVASDIHSYEQYF       | 1595                   |



|      |     |                    |      |
|------|-----|--------------------|------|
| 30   | 2-1 | CACNELGNKGAEQFF    | 1584 |
| 20-1 | 2-5 | CSAGPGLAQETQYF     | 1569 |
| 20-1 | 2-1 | CSAPRAGIADNEQFF    | 1536 |
| 6-1  | 2-1 | CASSDGEQGGKFF      | 1534 |
| 7-9  | 2-1 | CASSPTGGARYNEQFF   | 1508 |
| 20-1 | 2-7 | CSAIQGANEQYF       | 1503 |
| 28   | 2-5 | CASWRLRQETQYF      | 1502 |
| 7-2  | 2-3 | CASSFLPDSGMSTDTQYF | 1501 |
| 6-6  | 1-1 | CATDRIQWKTNTEAFF   | 1498 |
| 25-1 | 1-6 | CASSESVDGDSPLHF    | 1481 |
| 6-1  | 2-7 | CATGTLFSYEQYF      | 1478 |
| 25-1 | 2-1 | CASSDRRQRSSYNEQFF  | 1478 |
| 5-1  | 1-2 | CASSLEAAGGSGYTF    | 1460 |
| 5-6  | 1-3 | CASSLGQAGGNTIYF    | 1432 |
| 4-1  | 1-1 | CASSQEEQGIKNTEAFF  | 1408 |
| 7-2  | 2-5 | CASSRTGTSGGLQETQYF | 1402 |
| 5-1  | 1-6 | CASRTGGYADSPLHF    | 1391 |
| 20-1 | 1-2 | CSARAQDYGYTF       | 1371 |
| 5-5  | 1-1 | CASSWGGEFAEAF      | 1366 |
